# Supplementary material for: Lipid levels and the risk of dementia: A dose–response meta‐analysis of prospective cohort studies
Source: PubMed Central journal article supplement (PMC8935316; doi:10.1002/acn3.51516), 2022-02-24

**Table S1 Characteristics of the prospective cohort studies included in the meta-analysis.**

| Author, year             | Location    | Mean age, years (SD)                                 | Female (%)                                     | Participants, n | Follow-up time, years | Lipid measures                 | Diagnosis criteria                                                                                                                             | Disease type                | Adjusted confounders                                                          |
|--------------------------|-------------|------------------------------------------------------|------------------------------------------------|-----------------|-----------------------|--------------------------------|------------------------------------------------------------------------------------------------------------------------------------------------|-----------------------------|-------------------------------------------------------------------------------|
| 1 Yoshitake et al., 1995 | Japan       | Men = 73 (5.6),<br>Women = 74 (6.1).                 | 59.5                                           | 828             | 7                     | TC,<br>TG,<br>HDL-C,<br>LDL-C. | Hasegawa's dementia scale                                                                                                                      | AD, VaD                     | Age,<br>Gender.                                                               |
| 2 Hyman et al., 1996     | USA         | 79.08                                                | 64.8                                           | 1899            | 10                    | TC                             | Free recall task, SPMSQ                                                                                                                        | CIND                        | Age,<br>sex,<br>educational level,<br>chronic disease history,<br>depression. |
| 3 Notkola et al., 1998   | Finland     | Data not available                                   | 0                                              | 444             | 30                    | TC                             | MMSE, CDR Scale, SPMSQ, DSM-III                                                                                                                | AD                          | Age,<br>APOEε4.                                                               |
| 4 Slooter et al., 1999   | Netherlands | All dementia = 82.4 (7.5),<br>controls = 68.7 (7.9). | All dementia<br>= 67.0,<br>controls =<br>60.0. | 6435            | 2.1                   | TC,<br>HDL-C                   | DSM-III, NINCDS-ADRDA, NINDS-<br>AIREN                                                                                                         | All-cause dementia, AD, VaD | systolic blood pressure,<br>diastolic blood pressure,<br>BMI.                 |
| 5 Moroney et al., 1999   | USA         | 75 (5.9)                                             | 68.7                                           | 1111            | 2.1                   | LDL-C                          | National Institute of Neurological and<br>Cognitive Disorders and<br>Stroke/Alzheimer's Disease and Related<br>Disorders Association criteria. | AD, VaD                     | Sex,<br>education,<br>cardiac disease,<br>hypertension<br>DM,<br>ethnic       |

|                          |         |                                                                                           |    |                                           |          |                                |                                                                           |                              |                                                                                                                                         |
|--------------------------|---------|-------------------------------------------------------------------------------------------|----|-------------------------------------------|----------|--------------------------------|---------------------------------------------------------------------------|------------------------------|-----------------------------------------------------------------------------------------------------------------------------------------|
| 6 Kivipelto et al., 2002 | Finland | Overall = 71.3 (4.0),<br>midlife AD = 74.7 (3.8),<br>no dementia midlife = 71.1<br>(4.0). | 60 | 1287                                      | 21       | TC                             | MMSE, DSM- IV, NINCDS-ADRDA                                               | All-cause dementia, AD, CIND | Age,<br>BMI                                                                                                                             |
| 7 Tan et al., 2003       | USA     | 76.1 (5.3)                                                                                | 63 | 741                                       | Up to 40 | TC                             | MMSE, DSM-IV                                                              | AD                           | Age,<br>sex,<br>APOE genotype,<br>coronary heart disease,<br>smoking,<br>therapy to lower lipid levels,<br>diabetes,<br>body mass index |
| 8 Reitz et al., 2004     | USA     | Overall = 78.4 (6.2),<br>VaD = 81.6,<br>AD = 82.6.                                        | 68 | 2470                                      | 4.8      | TC,<br>TG,<br>HDL-C,<br>LDL-C. | NINCDS-ADRDA, VaD required clinical<br>evidence of stroke                 | AD, VaD                      | Sex,<br>age,<br>education,<br>ethnicity,<br>BMI,<br>APOEε4,<br>diabetes,<br>heart disease,<br>hypertension                              |
| 9 Solfrizzi et al., 2004 | Italy   | 75 (3.1)                                                                                  | 54 | All-cause<br>dementia: 121,<br>CIND:1445. | 3.5      | TC,<br>HDL-C.                  | MMSE, DSM-III, CAMDEX, NINCDS-<br>ADRDA, ICD10, Petersen criteria for MCI | All-cause dementia, CIND     | Age,<br>sex,<br>educational level.                                                                                                      |

|                           |        |                                                                   |      |      |     |                                |                                                                                                               |                             |                                                                                                                                                                                                                                             |
|---------------------------|--------|-------------------------------------------------------------------|------|------|-----|--------------------------------|---------------------------------------------------------------------------------------------------------------|-----------------------------|---------------------------------------------------------------------------------------------------------------------------------------------------------------------------------------------------------------------------------------------|
| 10 Li et al., 2005        | USA    | Dementia = 82.2 (6.1),<br>AD = 82.4 (5.3),<br>overall 74.9 (5.9). | 59.5 | 2112 | 5.6 | TC,<br>HDL-C.                  | CASI, DSM-IV, NINCDS-ADRDA                                                                                    | All-cause dementia, AD      | age at entry,<br>sex,<br>education<br>self-reported history of stroke or transient ischemic attack,<br>history of coronary artery disease,<br>history of hypertension,<br>history of diabetes mellitus,<br>CASI score,<br>BMI at enrolment. |
| 11 Mielke et al., 2005    | Sweden | 70                                                                | 59.2 | 382  | 18  | TC,<br>TG.                     | DSM-III                                                                                                       | All-cause dementia          | diastolic blood pressure,<br>BMI,<br>Sex,<br>education,<br>smoking.                                                                                                                                                                         |
| 12 Reitz et al., 2008     | USA    | 75.8 (5.9)                                                        | 68.7 | 864  | 1.5 | TC,<br>TG,<br>HDL-C,<br>LDL-C. | DSM-IV, letter fluency, category fluency<br>and the WAIS-R Similarities subtest,<br>Petersen Criteria for MCI | CIND                        | Sex,<br>age,<br>ethnicity,<br>education<br>APOE ε4,<br>Diabetes,<br>heart disease,<br>stroke,<br>hypertension.                                                                                                                              |
| 13 Raffaitin et al., 2009 | France | 73.4 (4.9)                                                        | 61   | 7077 | 4   | TG,<br>HDL-C.                  | MMSE, Benton Visual Retention Test,<br>Isaac's Set Test, DSM-IV, NINCDS-<br>ADRDA                             | All-cause dementia, AD, VaD | Age,<br>Sex,<br>educational level,<br>APOE ε4.                                                                                                                                                                                              |
| 14 Reitz et al., 2010     | USA    | 75.7 (6.3)                                                        | 65.7 | 1130 | 4.2 | TC,<br>HDL-C,<br>LDL-C.        | DSM-IV, NINCDS-ADRDA                                                                                          | AD                          | Age,<br>sex,<br>education,<br>ethnic group,<br>APOE ε4,                                                                                                                                                                                     |

|                         |        |                                                                                               |                                                                           |      |      |                         |                                                    |                          |                                                                                                                                                                                                                                                         |
|-------------------------|--------|-----------------------------------------------------------------------------------------------|---------------------------------------------------------------------------|------|------|-------------------------|----------------------------------------------------|--------------------------|---------------------------------------------------------------------------------------------------------------------------------------------------------------------------------------------------------------------------------------------------------|
|                         |        |                                                                                               |                                                                           |      |      |                         |                                                    |                          | diabetes mellitus,<br>hypertension,<br>heart disease,<br>BMI,<br>lipid-lowering treatment.                                                                                                                                                              |
| 15 Mielke et al., 2010  | Sweden | N/A                                                                                           | 100                                                                       | 1462 | 32   | TC                      | DSM-III-R, NINCDS-ADRDA                            | All-cause dementia, AD   | Education,<br>diastolic blood pressure,<br>BMI,<br>age,<br>cigarette smoking.                                                                                                                                                                           |
| 16 Beydoun et al., 2011 | USA    | No dementia or MCI = 51.5 (15.7), incident dementia = 81.9 (7.7), incident MCI = 65.7 (13.7). | No dementia or MCI = 39.6, incident dementia = 36.3, incident MCI = 33.3. | 1604 | 24.9 | TC                      | DSM-III-R, NINCDS-ADRDA, Petersen criteria for MCI | All-cause dementia, CIND | age at first visit,<br>sex,<br>education (years of schooling),<br>race and ethnicity,<br>smoking status,<br>type 2 diabetes,<br>hypertension,<br>cardiovascular disease or cerebrovascular disease<br>dyslipidemia,<br>BMI,<br>systolic blood pressure. |
| 17 Ancelin et al., 2013 | France | Women = 73.9 (5.3), men = 73.7 (5.3).                                                         | 61.1                                                                      | 7053 | 7    | TG,<br>LDL-C,<br>HDL-C. | DSM-IV, NINCDS-ADRDA, Hachinski Score              | All-cause dementia, AD   | Age,<br>center,<br>education level,<br>mobility,<br>hypertension,<br>diabetes,<br>depression,<br>anticholinergic use,<br>APOE ε4,<br>APO5,<br>CETP1,<br>intima media thickness,                                                                         |

---

|                              |         |            |      |      |      |               |                                     |  |      |                                                                                                                                                                                                                                                                                                                                                                      |
|------------------------------|---------|------------|------|------|------|---------------|-------------------------------------|--|------|----------------------------------------------------------------------------------------------------------------------------------------------------------------------------------------------------------------------------------------------------------------------------------------------------------------------------------------------------------------------|
|                              |         |            |      |      |      |               |                                     |  |      | BMI.                                                                                                                                                                                                                                                                                                                                                                 |
| 18 Taniguchi et al.,<br>2014 | Japan   | 75.5 (4.4) | 59.7 | 682  | 4    | TC,<br>HDL-C. | MMSE                                |  | CIND | Sex,<br>age,<br>educational attainment,<br>years of education,<br>study area,<br>living arrangement,<br>frequency of going outdoors,<br>alcohol drinking and smoking status,<br>history of chronic diseases,<br>body height and weight,<br>BMI,<br>resting blood pressure,<br>grip strength,<br>usual gait speed<br>self-rated health,<br>competence,<br>depression, |
| 19 Toro et al., 2014         | Germany | 74.3 (1.2) | 45.3 | 381  | 14   | TC            | AACD, NINCDS-ADRDA, NINDS-<br>AIREN |  | AD   | Education,<br>APOE ε4,<br>socio-economic status,<br>gender.                                                                                                                                                                                                                                                                                                          |
| 20 Rantanen et al., 2014     | Finland | 40 (30-45) | 0    | 1049 | 33.1 | TC            | Clinical Dementia Rating (CDR)      |  | AD   | Age,<br>smoking,<br>BMI,<br>systolic blood pressure.                                                                                                                                                                                                                                                                                                                 |

---

|                         |                |            |      |        |     |                                |                                                                                                                                                             |                             |                                                                                                                                                                                                |
|-------------------------|----------------|------------|------|--------|-----|--------------------------------|-------------------------------------------------------------------------------------------------------------------------------------------------------------|-----------------------------|------------------------------------------------------------------------------------------------------------------------------------------------------------------------------------------------|
| 21 Sabrina et al., 2017 | France         | 73.8 (5.3) | 61   | 7470   | 7.9 | TC,<br>TG,<br>HDL-C,<br>LDL-C. | DSM-IV f, National Institute of<br>Neurological and Communicative<br>Disorders and Stroke–Alzheimer’s Disease<br>and Related Disorders Association criteria | All-cause dementia, AD, VaD | Sex,<br>education,<br>center,<br>vascular risk factors,<br>APOEε4.                                                                                                                             |
| 22 Marcum et al., 2018  | USA            | ≥65        | 57   | 2852   | 7   | TC,<br>HDL-C.                  | CASI, DSM-IV                                                                                                                                                | AD                          | Sex,<br>race,<br>education,<br>early life financial difficulty rating,<br>smoking,<br>treatment for hypertension or diabetes,<br>BMI,<br>stratified by ACT cohort,<br>APOEε4 genotype.         |
| 23 Chung et al., 2019   | South<br>Korea | 55.5 (8.6) | 43.3 | 131965 | 8.4 | TC                             | ICD-10 codes (F00–F03, G30), ICD-10<br>code for AD (F00, G30), ICD-10 code for<br>VaD (F01)                                                                 | All-cause dementia, AD, VaD | Age,<br>sex,<br>income,<br>body mass index,<br>hypertension,<br>dyslipidemia,<br>history of myocardial infarction,<br>smoking,<br>alcohol intake,<br>exercise<br>mean total cholesterol level. |

|                          |             |            |      |                                      |    |                       |                 |                          |                                                                                                                                                                                                                                     |
|--------------------------|-------------|------------|------|--------------------------------------|----|-----------------------|-----------------|--------------------------|-------------------------------------------------------------------------------------------------------------------------------------------------------------------------------------------------------------------------------------|
| 24 Svensson et al., 2019 | Japan       | 54.4 (5.5) | 63.2 | All-cause dementia: 781, CIND: 1114. | 19 | HDL-C                 | MMSE, DSM-IV-TR | All-cause dementia, CIND | Hypertension, history of diabetes mellitus, use of cholesterol lowering medications, low density lipoprotein cholesterol, triglycerides.                                                                                            |
| 25 Lee et al., 2020      | South Korea | ≥65        | 54.5 | 178586                               | 6  | TC, TG, HDL-C, LDL-C. | ICD-10          | AD                       | Sex, age, income, lifestyles (smoking, alcohol consumption, and exercise), comorbidities, healthcare visit frequency, medication history, BMI, systolic/diastolic blood pressure, HDL-C, triglyceride, fasting glucose, hemoglobin. |

**Figure S1** Dose-response relationship between TC and risk of all-cause dementia.

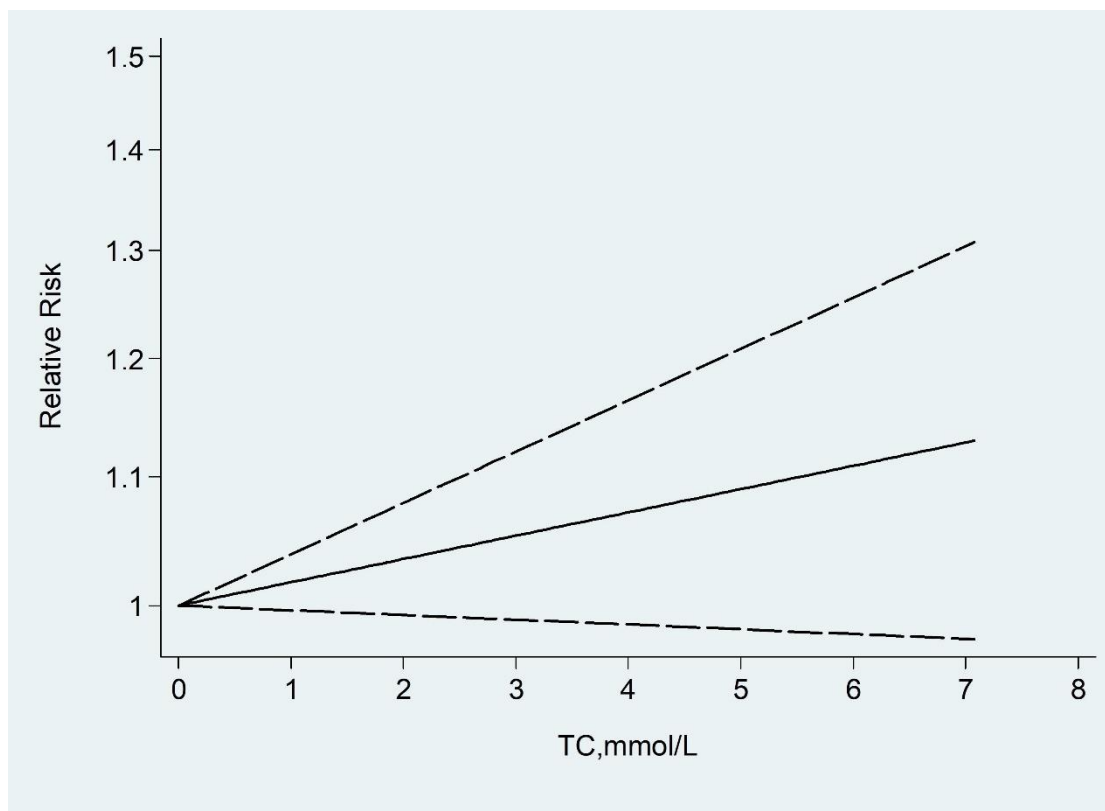



**Figure S2** Overall pooled analysis of association between TC levels and VaD.

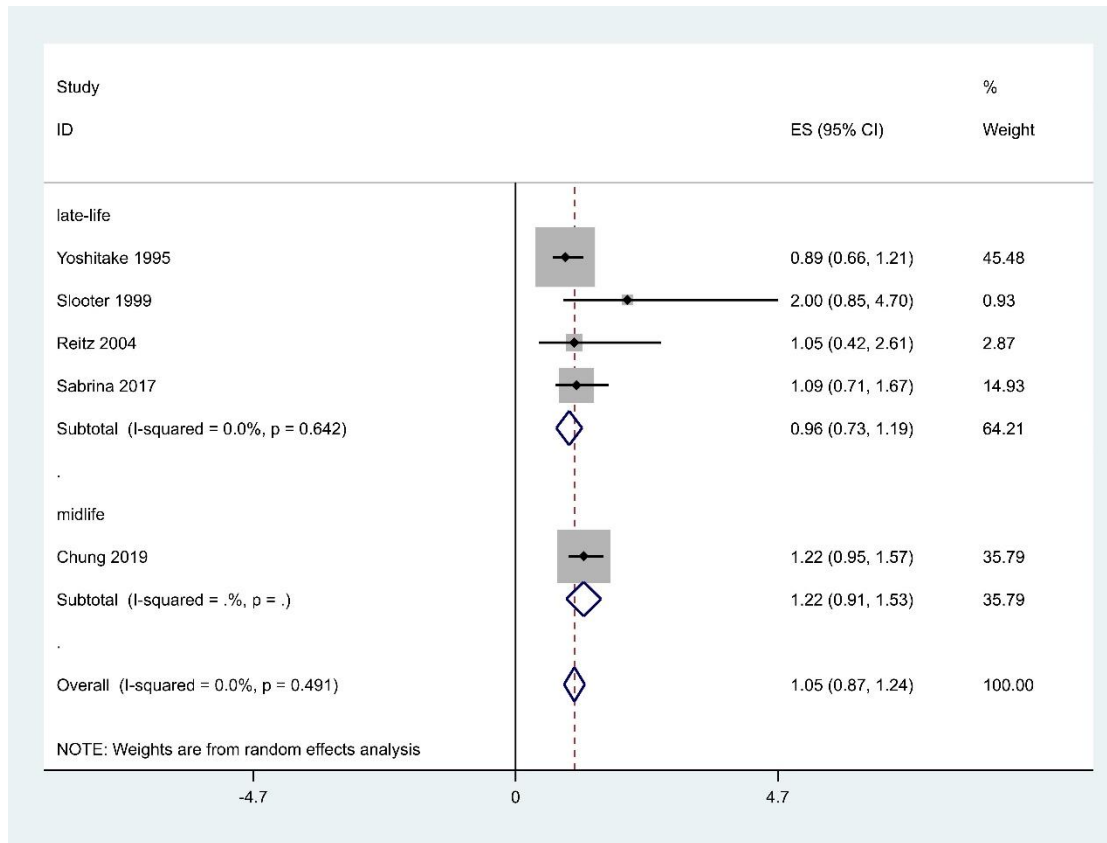

**Figure S3** Overall pooled analysis of association between TC levels and CIND.

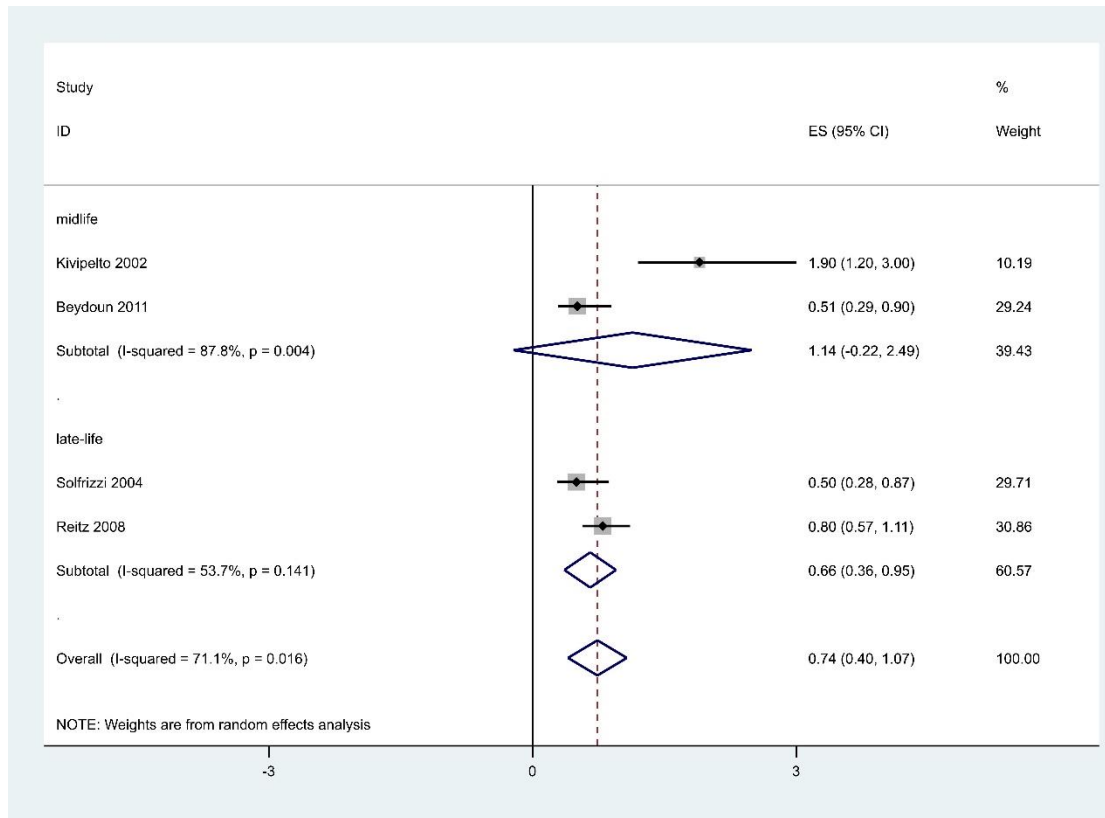

**Figure S4** Overall pooled analysis of association between TG levels and VaD.

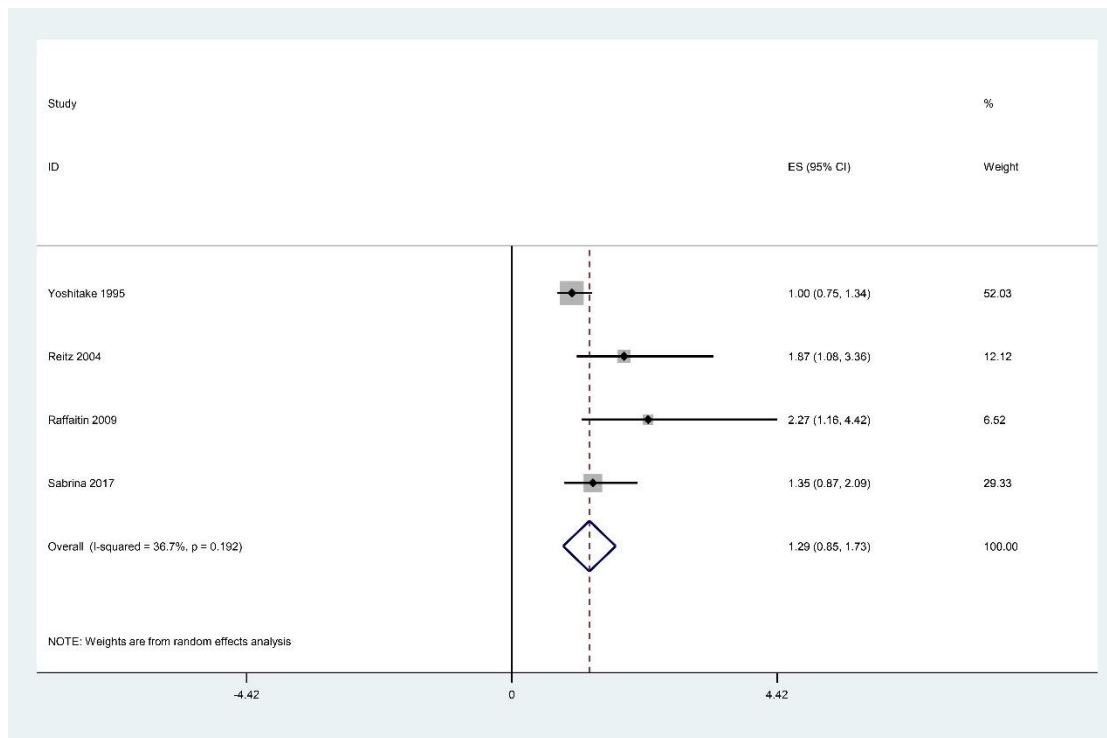

**Figure S5** Overall pooled analysis of association between LDL levels and AD.

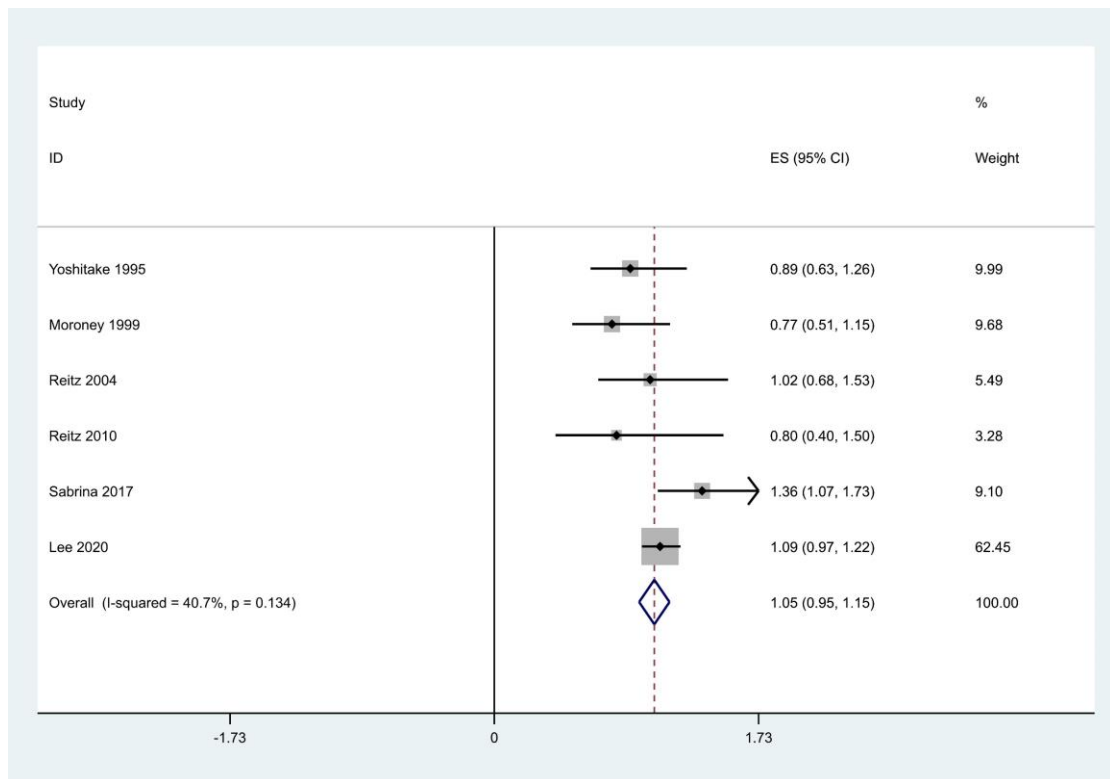

Supplement: ACN3-9-296-s001.pdf [file ACN3-9-296-s001.pdf]
